# Supplementary material
Source: publisher figshare collection journal article supplement (https://aacr.figshare.com/articles/dataset/_/22429954)
Supplement: Supplementary file 1 [file 39876289]

**Fig S1.**

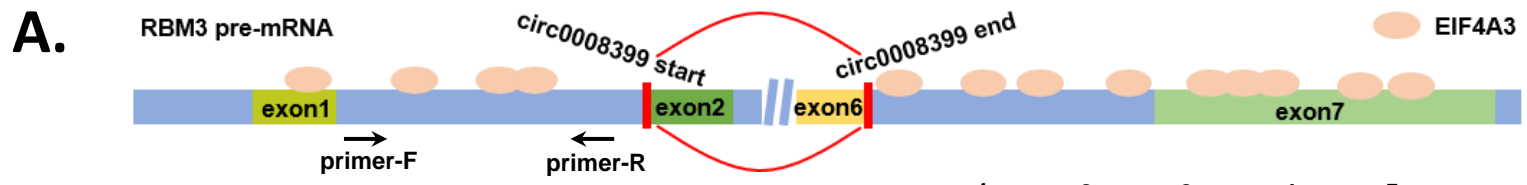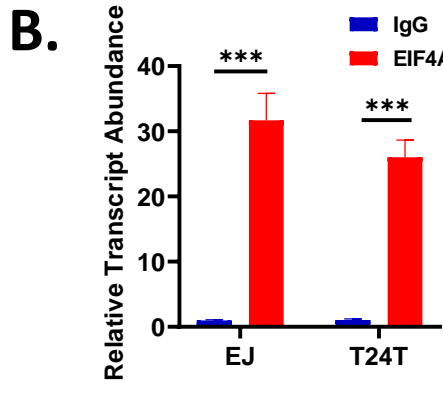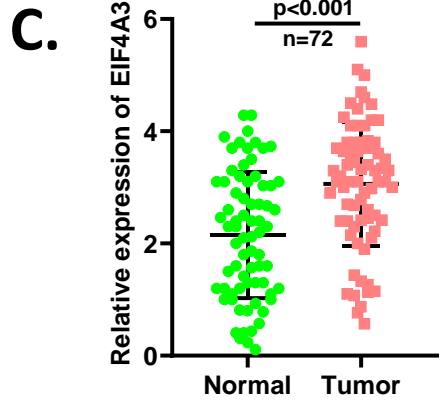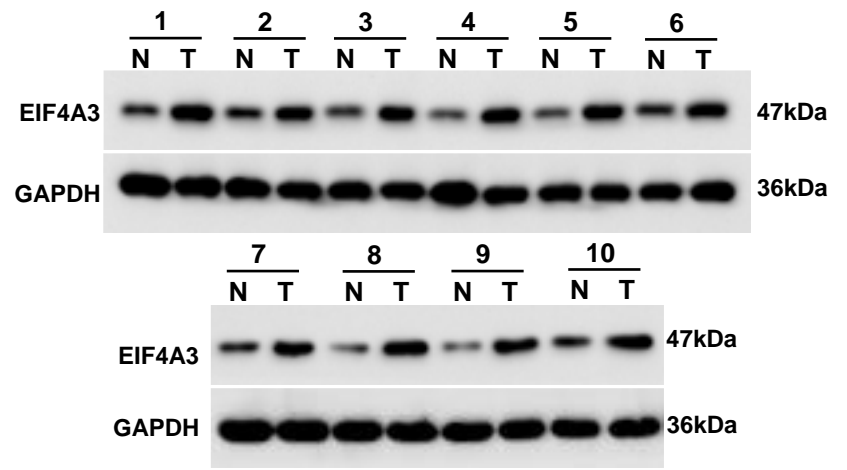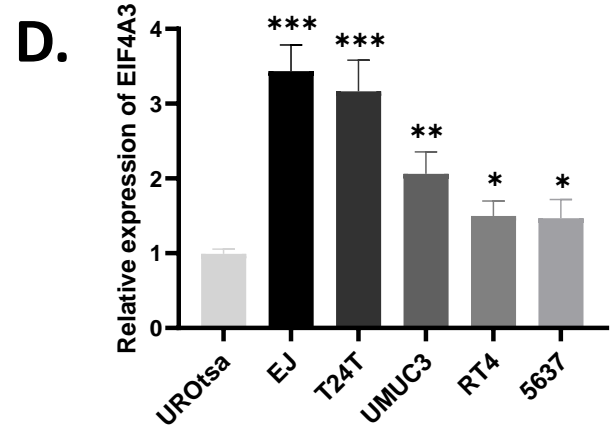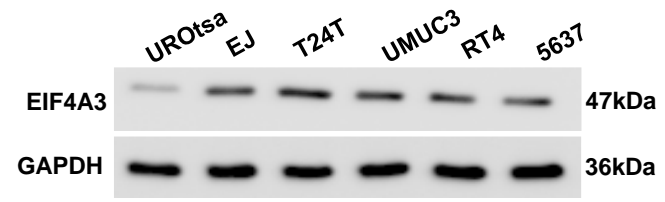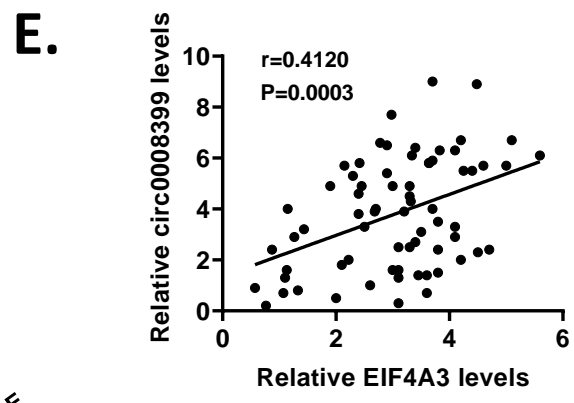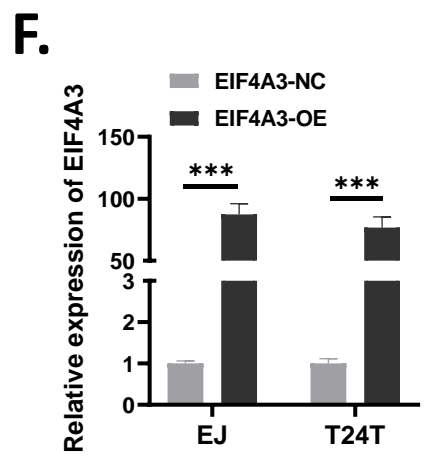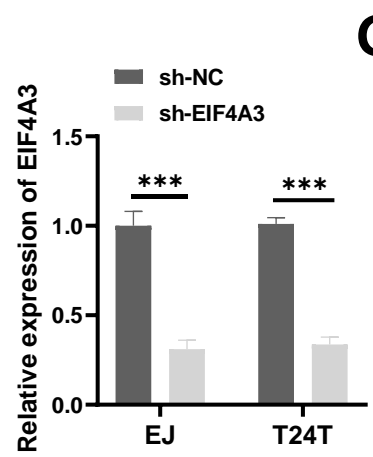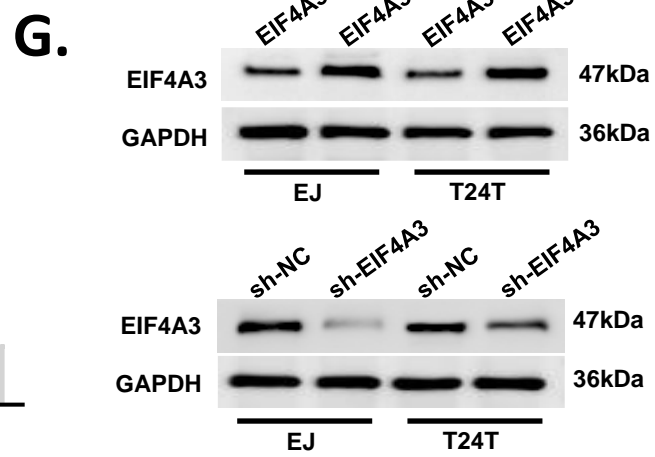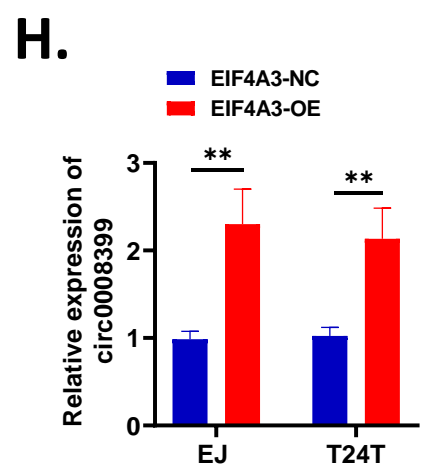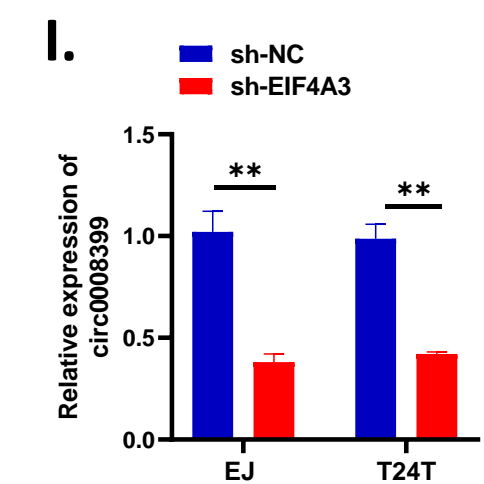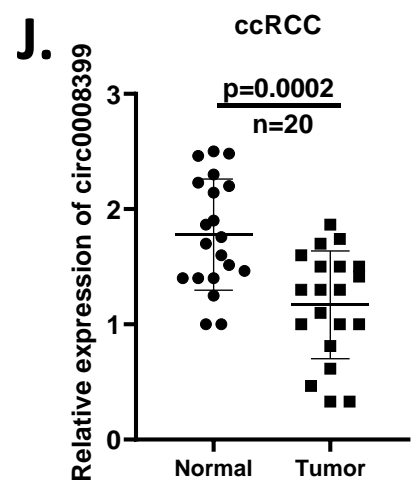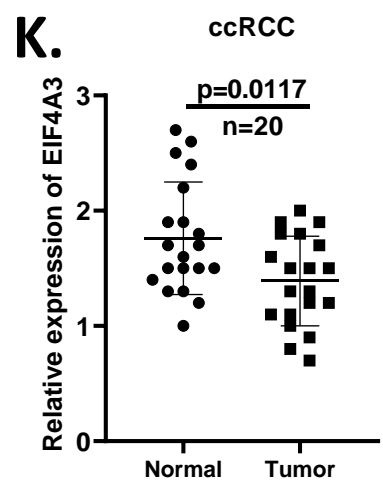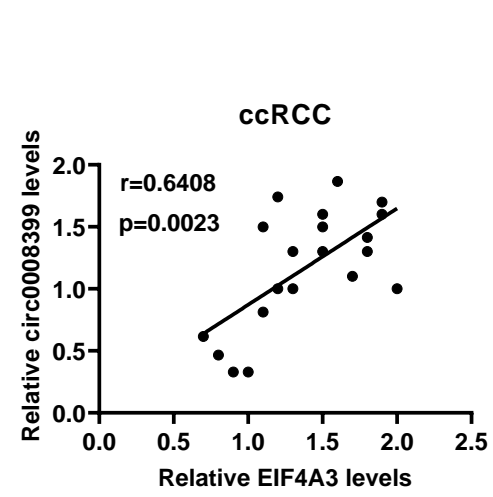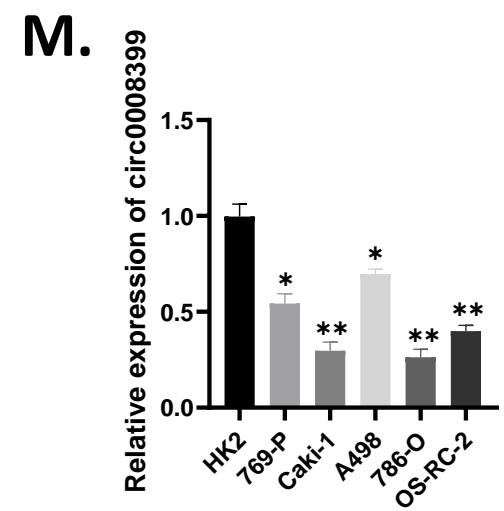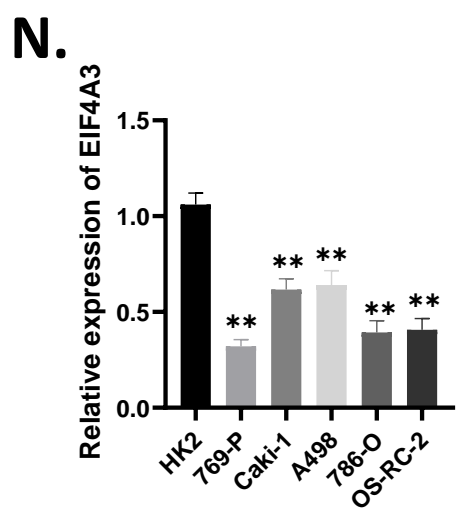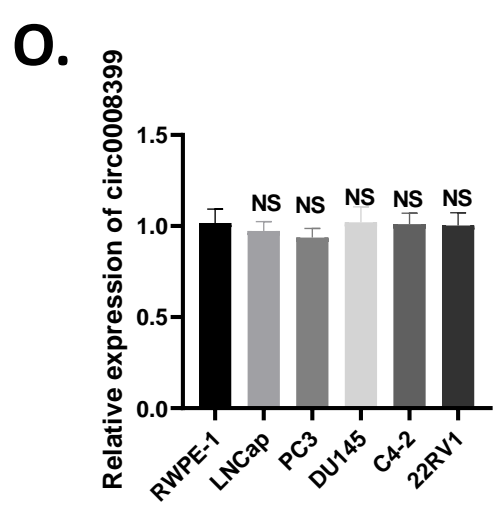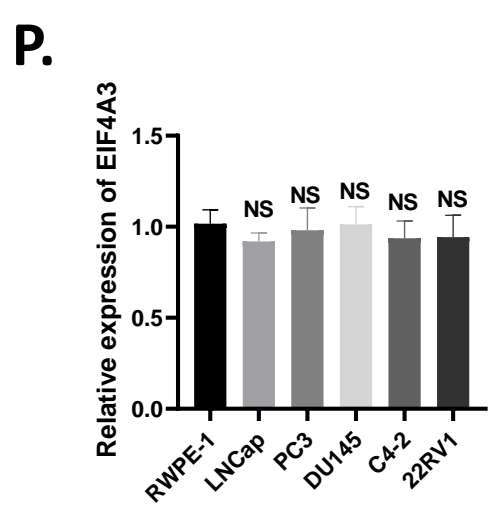

**Supplementary Fig.1 EIF4A3 promotes the biogenesis of circ0008399 in BC.**

**(A)** The putative binding sites of EIF4A3 in the upstream and downstream region of the RBM3 pre-mRNA were predicted with CircInteractome database, and designed primers for detecting pre-mRNA of RBM3.

**(B)** RIP assay confirmed that EIF4A3 could directly bind to the RBM3 pre-mRNA in BC cells. IgG were used as the negative controls.

**(C)** The relative expression of EIF4A3 in BC tissues were detected by qRT-PCR and western blot.

**(D)** The relative expression of EIF4A3 in BC cells were detected by qRT-PCR and western blot.

**(E)** The correlation between the expression of EIF4A3 and circ0008399 in BC tissues. The relative expression of EIF4A3 and circ0008399 was calculated by  $\Delta$ Ct value.

**(F-G)** The overexpression and knockdown efficiencies of EIF4A3 in BC cells were detected by qRT-PCR **(F)** and western blot **(G)**.

**(H-I)** Circ0008399 expression was detected in BC cells after EIF4A3 up-regulation **(H)** or down-regulation **(I)** by qRT-PCR.

**(J-K)** The relative expression of circ0008399 **(J)** and EIF4A3 **(K)** in ccRCC tissues were detected by qRT-PCR.

**(L)** The correlation between EIF4A3 and circ0008399 in ccRCC samples. The relative expression of EIF4A3 and circ0008399 was calculated by  $\Delta$ Ct value.

**(M-N)** The relative expression of circ0008399 **(M)** and EIF4A3 **(N)** in ccRCC cells were detected by qRT-PCR.

**(O-P)** The relative expression of circ0008399 **(O)** and EIF4A3 **(P)** in prostate cancer cells were detected by qRT-PCR.

Data are presented as the means  $\pm$  SD from three independent experiments. \*P < 0.05; \*\*P < 0.01; \*\*\*P < 0.001 (Student's t test)
